# Supplementary material
Source: PubMed Central journal article supplement (PMC6443236)
Supplement: NIHMS1013676-supplement-1.pdf [file NIHMS1013676-supplement-1.pdf]

**Supplemental Material. List of 30 most populous metropolitan statistical areas (MSAs) in 2012**

---

MSAs included in the county-level analyses

---

- |                                                 |                                             |
|-------------------------------------------------|---------------------------------------------|
| 1. New York-Newark-Jersey City, NY-NJ-PA        | 16. Minneapolis-St. Paul-Bloomington, MN-WI |
| 2. Los Angeles-Long Beach-Anaheim, CA           | 17. San Diego-Carlsbad, CA                  |
| 3. Chicago-Naperville-Elgin, IL-IN-WI           | 18. Tampa-St. Petersburg-Clearwater, FL     |
| 4. Dallas-Fort Worth-Arlington, TX              | 19. St. Louis, MO-IL                        |
| 5. Houston-The Woodlands-Sugar Land, TX         | 20. Baltimore-Columbia-Towson, MD           |
| 6. Philadelphia-Camden-Wilmington, PA           | 21. Denver-Aurora-Lakewood, CO              |
| 7. Washington-Arlington-Alexandria, DC-VA-MD-WV | 22. Pittsburgh, PA                          |
| 8. Miami-Fort Lauderdale-West Palm Beach, FL    | 23. Charlotte-Concord-Gastonia, NC-SC       |
| 9. Atlanta-Sandy Springs-Roswell, GA            | 24. Portland-Vancouver-Hillsboro, OR-WA     |
| 10. Boston-Cambridge-Newton, MA-NH              | 25. San Antonio-New Braunfels, TX           |
| 11. San Francisco-Oakland-Fremont, CA           | 26. Orlando-Kissimmee-Sanford, FL           |
| 12. Riverside-San Bernardino-Ontario, CA        | 27. Sacramento-Roseville-Arden-Arcade, CA   |
| 13. Phoenix-Mesa-Scottsdale, AZ                 | 28. Cincinnati, OH-KY-IN                    |
| 14. Detroit-Warren-Dearborn, MI                 | 29. Cleveland-Elyria, OH                    |
| 15. Seattle-Tacoma-Bellevue, WA                 | 30. Kansas City, MO-KS                      |
-
